# Supplementary material
Source: Springer Nature journal article supplement (https://mijn.bsl.nl/resource/supplementary/13047_2013_592_MOESM1_ESM.pdf/7113170)

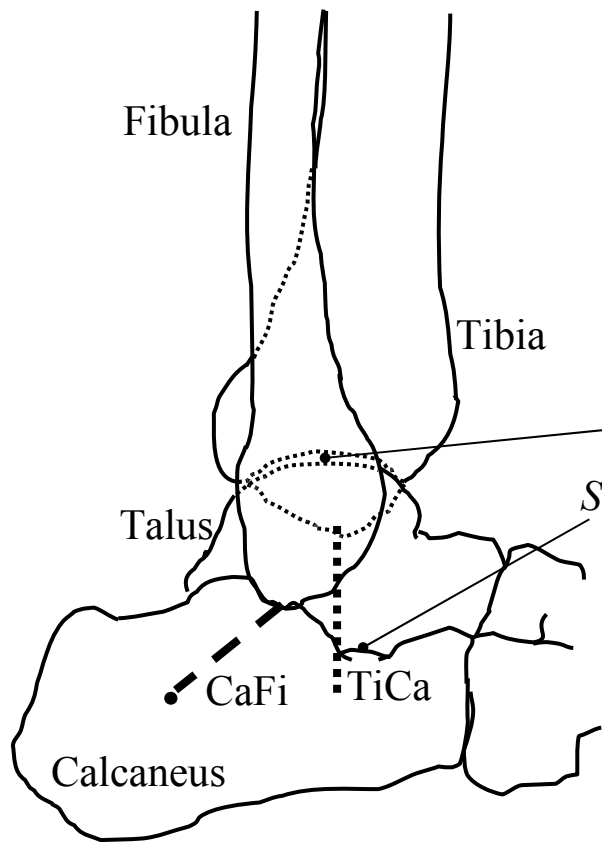

Sagittal view

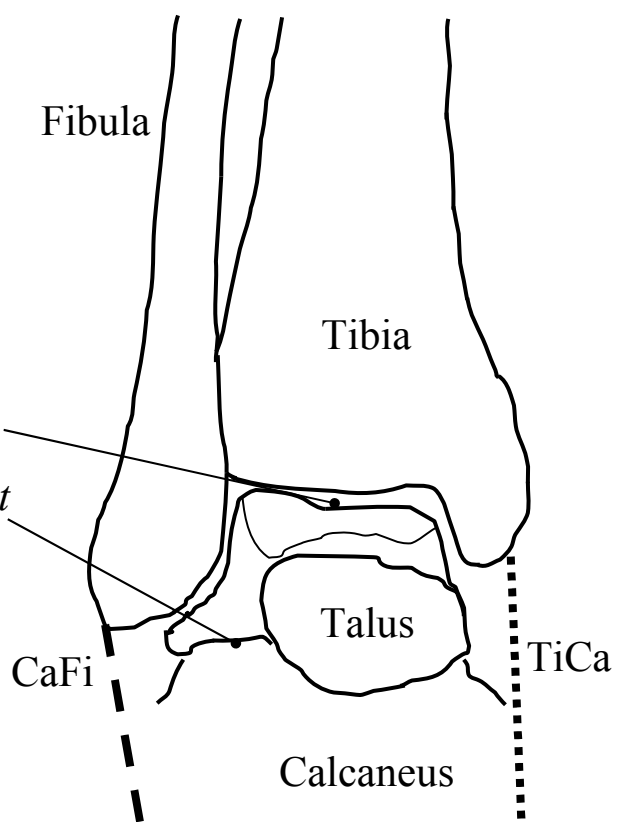

Frontal view

Supplement: MOESM1 [file 7113170]
